# Supplementary material for: Critical roles of CTP synthase N-terminal in cytoophidium assembly
Source: PubMed Central journal article supplement (PMC5405848; doi:10.1016/j.yexcr.2017.03.042), 2017-05-15
Supplement: mmc1.pdf [file mmc1.pdf]

## **Supplementary Material**

### **Critical roles of CTP synthase N-terminal in cytoophidium assembly**

**Yong Huang<sup>a,b</sup>, Jin-Jun Wang<sup>b</sup>, Sanjay Ghosh<sup>a,1,\*</sup> and Ji-Long Liu<sup>a,c,\*</sup>**

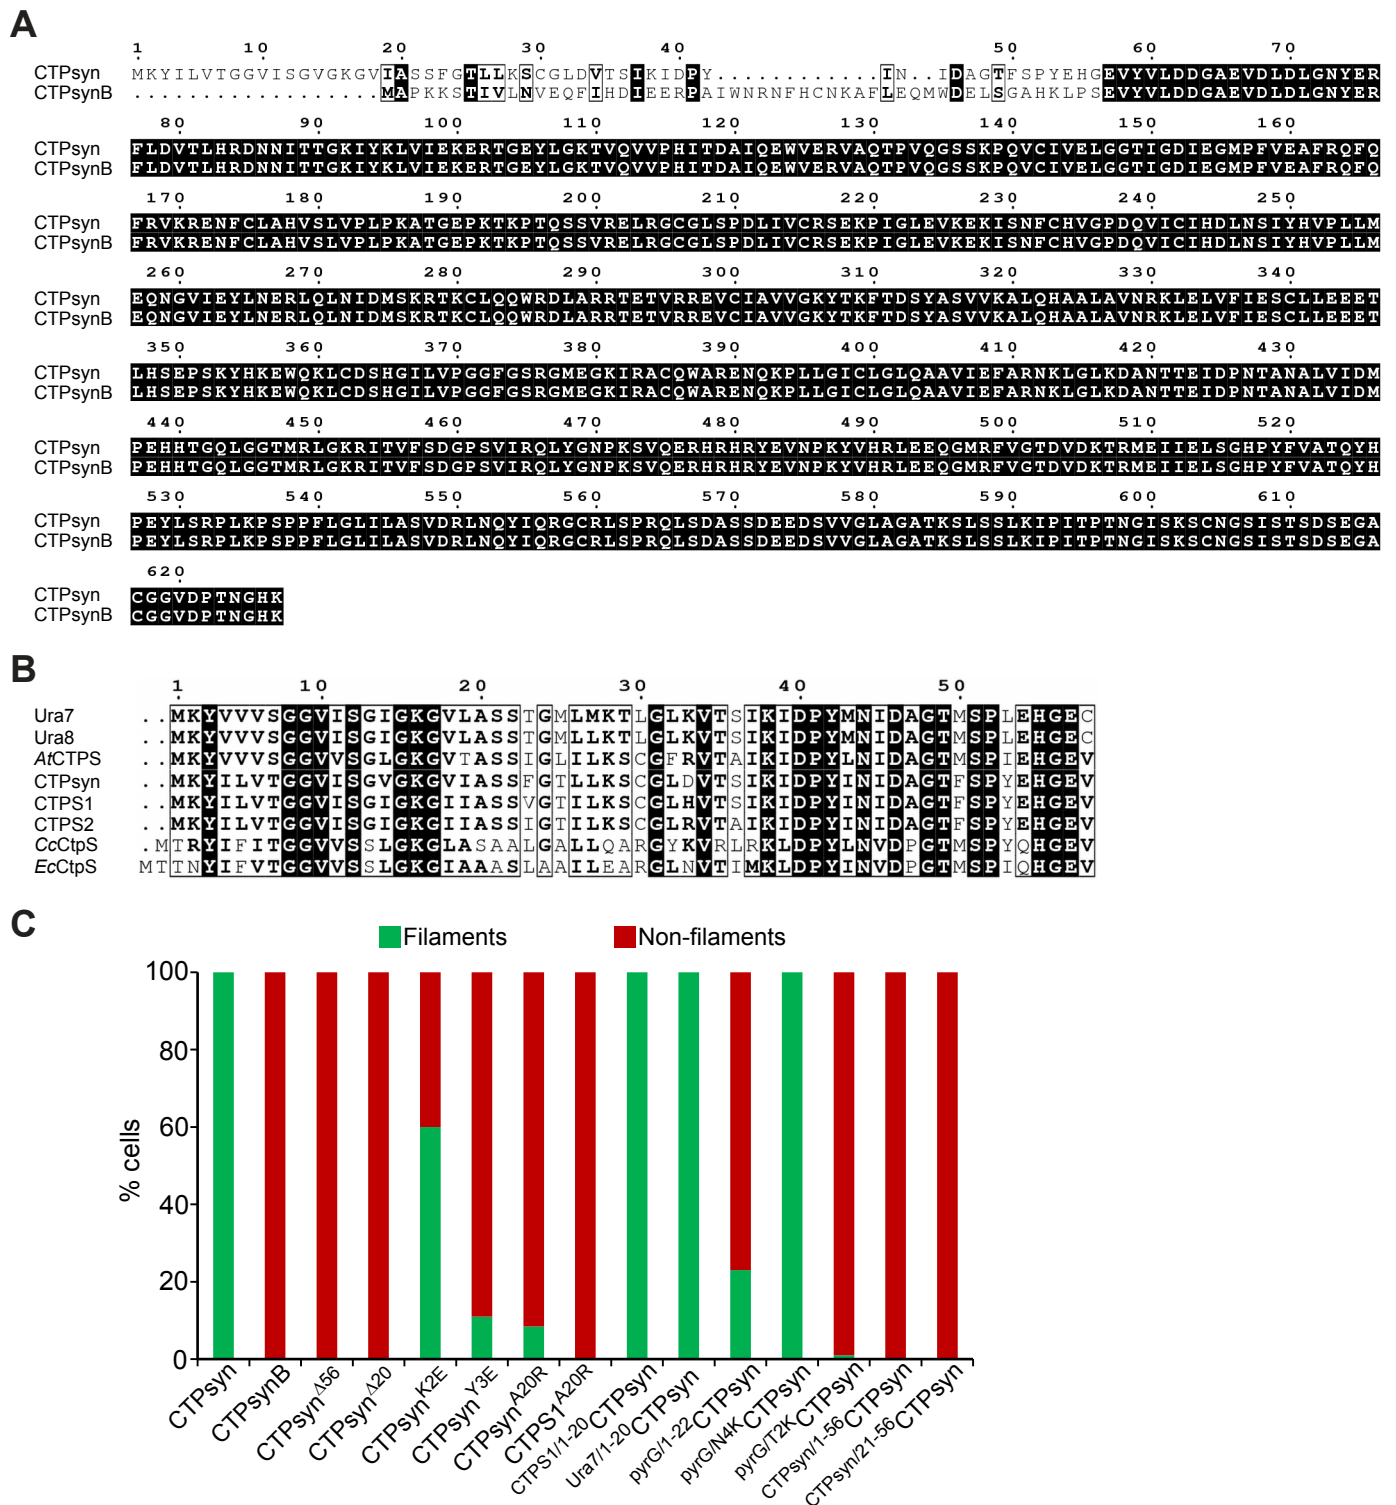

**Figure S1. *Drosophila* CTPsyn has a unique N-terminal sequence that is conserved in the orthologous proteins.** (A) Amino acid sequence alignment of *Drosophila* CTPsyn and CTPsynB polypeptides using the Clustal omega programme (<http://www.ebi.ac.uk/Tools/msa/clustalo/>) reveals a unique N-terminal for both proteins (56 amino acids for CTPsyn, 52 amino acids for CTPsynB). (B) Multiple sequence alignment of CTPsynthetase N-terminal 56 amino acids from *Drosophila melanogaster* (CTPsyn) with the corresponding CTP synthetase region from *Saccharomyces cerevisiae* (Ura7 and Ura8), *Arabidopsis thaliana* (AtCTPS), human (CTPS1 and CTPS2), *Caulobacter crescentus* (CcCtps), and *Escherichia coli* (EcCtps) proteins. The sequence alignment was performed using Clustal omega and presented using Espirit3 (<http://esprit3.ibcp.fr>). The amino acid position shown at the top of the sequence is from the N-terminal end of the *Drosophila* protein. The identical amino acids are shaded in black. (C) Quantitation of filament-forming capacity of all proteins derived from the constructs generated in this study. Cells showing filamentous structures and clumps/aggregates (non-filaments) were counted and the percentages shown in green and red, respectively, on the y-axis of the stacked barplot. The constructs are shown on the x-axis. At least 75 Venus-positive cells were counted for each construct.

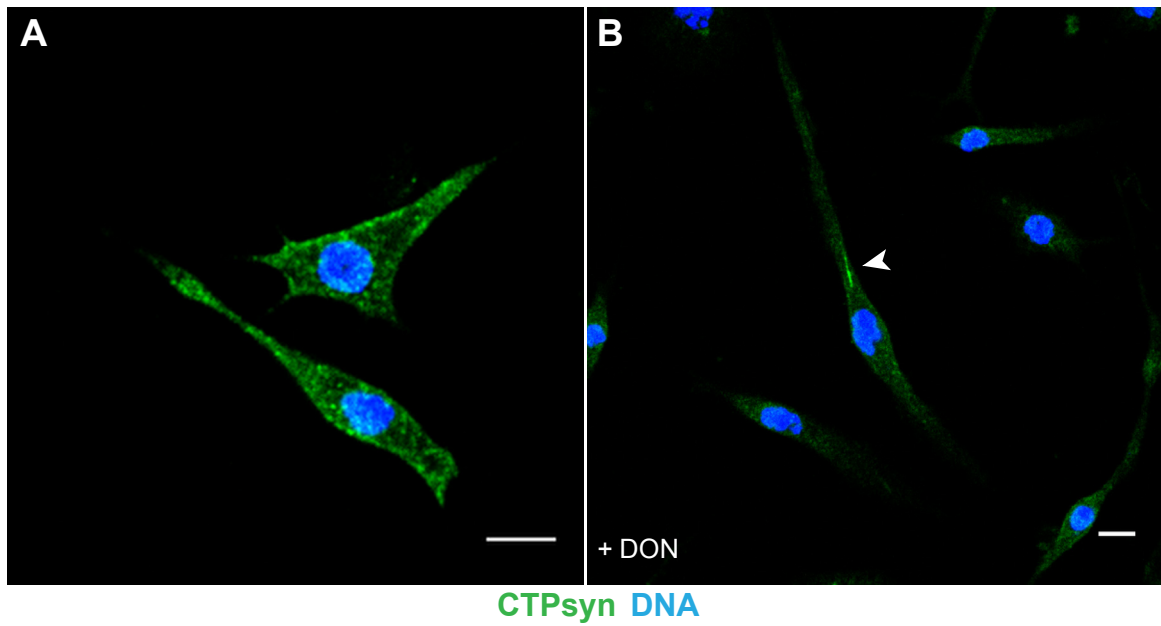

**Figure S2. Distribution of CTPsyn in *Drosophila* clone 8 cells.**

Immunofluorescence staining of clone 8 cells with anti-CTPsyn antibody in absence (A) or presence of DON (B). The arrowhead shows CTPsyn filament within a cell treated with DON. Hoescht staining of DNA is shown in blue. Scale bar = 5 μm.

**Figure S2**

**Huang et al.**

**Table S1. List of primers used in this study.**

| Oligo | Sequences (5' > 3')                                                                                                                                                                                                                                                              |
|-------|----------------------------------------------------------------------------------------------------------------------------------------------------------------------------------------------------------------------------------------------------------------------------------|
| OL1   | CACCATGAAATACATCCTGGTAACTGGTGG                                                                                                                                                                                                                                                   |
| OL2   | CACCATGGCGCCAAAAAAGTCCAC                                                                                                                                                                                                                                                         |
| OL3   | CTTATGGCCATTGGTAGGATCAAC                                                                                                                                                                                                                                                         |
| OL4   | CACCATGAAGTACATTCTGGTACTGGTG                                                                                                                                                                                                                                                     |
| OL5   | GTCATGATTTATTGATGGAACTTC                                                                                                                                                                                                                                                         |
| OL6   | CACCATGAAGTACATCCTGGTCACG                                                                                                                                                                                                                                                        |
| OL7   | GCTTATTTCCAACCTCAGCTATCC                                                                                                                                                                                                                                                         |
| OL8   | GAGGTTTACGTTTTGGACGATGG                                                                                                                                                                                                                                                          |
| OL9   | TCCTCGTTCGGAACGCTTTTG                                                                                                                                                                                                                                                            |
| OL10  | CATGGTGAAGGGGGCGGC                                                                                                                                                                                                                                                               |
| OL11  | ACAAAAAAGCAGGCTCCGCGGCCGCCCCCTTCACCA<br>TGAAGTACATTCTGGTACTGGTGGTGTATATCAGG<br>AATTGGAAAAGGAATCATTGCCTCCTCGTTCGGAAC<br>GCTTTTGAAATCCTGTGGTCT                                                                                                                                     |
| OL12  | ACAAAAAAGCAGGCTCCGCGGCCGCCCCCTTCACCA<br>TGAAGTACGTTGTTGTTTCAGGTGGTGTCAATTCGGG<br>TATCGGTAAAGGTGTTCTTGCATCCTCGTTCGGAACG<br>CTTTTGAAATCCTGTGGTCT                                                                                                                                   |
| OL13  | ACAAAAAAGCAGGCTCCGCGGCCGCCCCCTTCACCA<br>TGACAACGAACATATTTTTGTGACCGGCGGGGTCGT<br>ATCCTCTCTGGGTAAAGGCATTGCCGCATCCTCGTTC<br>GGAACGCTTTTGAAATCCTGTGGTCT                                                                                                                              |
| OL14  | GCGCCAAAAAAGTCCACCATTG                                                                                                                                                                                                                                                           |
| OL15  | CTTTGTACAAAAAAGCAGGCTCCGCGGCCGCCCCCTT<br>CACCATGAAATACATCCTGGTAACTGGTGGCGTCATT<br>AGTGGCGTGGGAAAAGGAGTGATTGCCTCCTCGTTC<br>GGAACGCTTTTGAAATCCTGTGGTCTGGATGTAACCT<br>CGATCAAGATTGACCCCTATATCAATATAGATGCTGG<br>AACCTTTTCGCCTTATGAGCATGGCGGCCAAAAAA<br>GTCCACCATTGTGCTCAATGTGGAGCAGT |
| OL16  | CTTTGTACAAAAAAGCAGGCTCCGCGGCCGCCCCCTT<br>CACCATGTCCTCGTTCGGAACGCTTTTGAAATCCTGT<br>GGTCTGGATGTAACCTCGATCAAGATTGACCCCTATA<br>TCAATATAGATGCTGGAACCTTTTCGCCTTATGAGCA<br>TGGCGGCCAAAAAAGTCCACCATTGTGCTCAATGT<br>GGAGCAGT                                                              |
| OL17  | GCCCCCTTCACCATGGAATACATCCTGGTAAC                                                                                                                                                                                                                                                 |
| OL18  | GTTACCAGGATGTATTCCATGGTGAAGGGGGC                                                                                                                                                                                                                                                 |
| OL19  | CCCCCTTCACCATGAAAGAGATCCTGGTAACTGGTG                                                                                                                                                                                                                                             |
| OL20  | CACCAGTTACCAGGATCTCTTTCATGGTGAAGGGGG                                                                                                                                                                                                                                             |
| OL21  | CTTCACCATGAAATACGCCCTGGTAACTGGTGG                                                                                                                                                                                                                                                |
| OL22  | CCACCAGTTACCAGGGCGTATTTTCATGGTGAAG                                                                                                                                                                                                                                               |
| OL23  | CATGAAATACATCGCGGTAACCTGGTGGC                                                                                                                                                                                                                                                    |

|      |                                       |
|------|---------------------------------------|
| OL24 | GCCACCAGTTACCGCGATGTATTTTCATG         |
| OL25 | GAAATACATCCTGGCAACTGGTGGCGTC          |
| OL26 | GACGCCACCAGTTGCCAGGATGTATTTTC         |
| OL27 | GAAATACATCCTGGTAGCTGGTGGCGTCATTAG     |
| OL28 | CTAATGACGCCACCAGCTACCAGGATGTATTTTC    |
| OL29 | CATCCTGGTAACTGCTGGCGTCATTAGTG         |
| OL30 | CACTAATGACGCCAGCAGTTACCAGGATG         |
| OL31 | CTGGTAACTGGTGGCGTCATTAGTGGC           |
| OL32 | GCCACTAATGACGGCACCAGTTACCAG           |
| OL33 | GTAACCTGGTGGCGCCATTAGTGGCGTG          |
| OL34 | CACGCCACTAATGGCGCCACCAGTTAC           |
| OL35 | GGTAACTGGTGGCGTCCGTAGTGGCGTGGGAAAAG   |
| OL36 | CTTTTCCCACGCCACTACGGACGCCACCAGTTACC   |
| OL37 | CTGGTGGCGTCATTAAAGGCGTGGGAAAAGG       |
| OL38 | CCTTTTCCCACGCCTTTAATGACGCCACCAG       |
| OL39 | GTGGCGTCATTAGTAGCGTGGGAAAAGG          |
| OL40 | CCTTTTCCCACGCTACTAATGACGCCAC          |
| OL41 | GTCATTAGTGGCGCGGGAAAAGGAGTG           |
| OL42 | CACTCCTTTTCCCAGCCACTAATGAC            |
| OL43 | CATTAGTGGCGTGGCAAAAAGGAGTGATTGC       |
| OL44 | GCAATCACTCCTTTTGGCACGCCACTAATG        |
| OL45 | CATTAGTGGCGTGGGAGCAGGAGTGATTGCCTC     |
| OL46 | GAGGCAATCACTCCTGCTCCCACGCCACTAATG     |
| OL47 | GCGTGGGAAAAGCAGTGATTGCCTCC            |
| OL48 | GGAGGCAATCACTGCTTTTCCCACGC            |
| OL49 | GTGGCGTGGGAAAAGGACGGATTGCCTCCTCGTTC   |
| OL50 | GAACGAGGAGGCAATCCGTCCTTTTCCCACGCCAC   |
| OL51 | GAAAAGGAGTGATTTCGCTCCTCGTTCGGAAC      |
| OL52 | GTTCCGAACGAGGAGCGAATCACTCCTTTTC       |
| OL53 | GAAAAGGAATCATTTCGACAGTGTGGGCAC        |
| OL54 | GTGCCACACTGCTGCGAATGATTTCCTTTTC       |
| OL55 | GCCCCCTTCACCATGAAAACGAACTATATTTTTG    |
| OL56 | CAAAAATATAGTTCGTTTTTCATGGTGAAGGGGGC   |
| OL57 | CTTCACCATGACAACGAAATATATTTTTGTGACCGGC |
| OL58 | GCCGGTCACAAAATATATTTTCGTTGTCATGGTGAAG |
